# Supplementary material for: Lipidomic and biophysical homeostasis of mammalian membranes counteracts dietary lipid perturbations to maintain cellular fitness
Source: PubMed Central journal article supplement (PMC7067841; doi:10.1038/s41467-020-15203-1), 2020-03-12
Supplement: 41467_2020_15203_MOESM5_ESM.pdf [file 41467_2020_15203_MOESM5_ESM.pdf]

**Title:** Supplementary Data

**Description:** Raw lipidomes. Lipid species abundances (in picomoles) for all samples reported in this manuscript.
